# Supplementary material for: Bacterial microbiome profiles of the inflamed terminal ileum mucosa in active Crohn’s disease patients
Source: PeerJ journal article supplement (doi:10.7717/peerj.19959), 2025-09-23
Supplement: Human1.xlsx [file Human1.xlsx]

## Sheet: Human.1.0
# This is a submission template for batch deposit of 'Human; version 1.0' samples to the NCBI BioSample database (https://www.ncbi.nlm.nih.gov/biosample/).
# GREEN fields are mandatory. Your submission will fail if any mandatory fields are not completed. If information is unavailable for any mandatory field, please enter 'not collected', 'not applicable' or 'missing' as appropriate.
# YELLOW fields are optional. Leave optional fields empty (or delete them) if no information is available.
# You can add any number of custom fields to fully describe your BioSamples, simply include them in the table.
# Hover over field name to view definition, or see https://www.ncbi.nlm.nih.gov/biosample/docs/attributes/.
# CAUTION: Be aware that Excel may automatically apply formatting to your data. In particular, take care with dates, incrementing autofills and special characters like / or -. Doublecheck that your text file is accurate before uploading to BioSample.
# TO MAKE A SUBMISSION:
# 1. Complete this template table.
# 2. Upload the file on the 'Attributes' tab of the BioSample Submission Portal at https://submit.ncbi.nlm.nih.gov/subs/biosample/.
# If you have any questions, please contact us at biosamplehelp@ncbi.nlm.nih.gov.
#
*sample_name	sample_title	bioproject_accession	*organism	*isolate	*age	*biomaterial_provider	*sex	*tissue	cell_line	cell_subtype	cell_type	culture_collection	dev_stage	disease	disease_stage	ethnicity	health_state	karyotype	phenotype	population	race	sample_type	treatment	description
3B			Homo sapiens	inflamed mucosa of terminal ileum in NO.3 patient with crohn disease	30	Zhi Pang, 242 Guangji Road, Suzhou, Jiangsu, China.	male	intestinal mucosa
3D			Homo sapiens	noninflamed mucosa of terminal ileum in NO.3 patient with crohn disease	30	Zhi Pang, 242 Guangji Road, Suzhou, Jiangsu, China.	male	intestinal mucosa
5B			Homo sapiens	inflamed mucosa of terminal ileum in NO.5 patient with crohn disease	27	Zhi Pang, 242 Guangji Road, Suzhou, Jiangsu, China.	male	intestinal mucosa
5D			Homo sapiens	noninflamed mucosa of terminal ileum in NO.5 patient with crohn disease	27	Zhi Pang, 242 Guangji Road, Suzhou, Jiangsu, China.	male	intestinal mucosa
6B			Homo sapiens	inflamed mucosa of terminal ileum in NO.6 patient with crohn disease	52	Zhi Pang, 242 Guangji Road, Suzhou, Jiangsu, China.	female	intestinal mucosa
6D			Homo sapiens	noninflamed mucosa of terminal ileum in NO.6 patient with crohn disease	52	Zhi Pang, 242 Guangji Road, Suzhou, Jiangsu, China.	female	intestinal mucosa
7B			Homo sapiens	inflamed mucosa of terminal ileum in NO.7 patient with crohn disease	35	Zhi Pang, 242 Guangji Road, Suzhou, Jiangsu, China.	female	intestinal mucosa
7D			Homo sapiens	noninflamed mucosa of terminal ileum in NO.7 patient with crohn disease	35	Zhi Pang, 242 Guangji Road, Suzhou, Jiangsu, China.	female	intestinal mucosa
17B			Homo sapiens	inflamed mucosa of terminal ileum in NO.17 patient with crohn disease	42	Zhi Pang, 242 Guangji Road, Suzhou, Jiangsu, China.	male	intestinal mucosa
17D			Homo sapiens	noninflamed mucosa of terminal ileum in NO.17 patient with crohn disease	42	Zhi Pang, 242 Guangji Road, Suzhou, Jiangsu, China.	male	intestinal mucosa
18B			Homo sapiens	inflamed mucosa of terminal ileum in NO.18 patient with crohn disease	40	Zhi Pang, 242 Guangji Road, Suzhou, Jiangsu, China.	female	intestinal mucosa
18D			Homo sapiens	noninflamed mucosa of terminal ileum in NO.18 patient with crohn disease	40	Zhi Pang, 242 Guangji Road, Suzhou, Jiangsu, China.	female	intestinal mucosa
21B			Homo sapiens	inflamed mucosa of terminal ileum in NO.21 patient with crohn disease	42	Zhi Pang, 242 Guangji Road, Suzhou, Jiangsu, China.	female	intestinal mucosa
21D			Homo sapiens	noninflamed mucosa of terminal ileum in NO.21 patient with crohn disease	42	Zhi Pang, 242 Guangji Road, Suzhou, Jiangsu, China.	female	intestinal mucosa
23B			Homo sapiens	inflamed mucosa of terminal ileum in NO.23 patient with crohn disease	29	Zhi Pang, 242 Guangji Road, Suzhou, Jiangsu, China.	male	intestinal mucosa
23D			Homo sapiens	noninflamed mucosa of terminal ileum in NO.23 patient with crohn disease	29	Zhi Pang, 242 Guangji Road, Suzhou, Jiangsu, China.	male	intestinal mucosa
27B			Homo sapiens	inflamed mucosa of terminal ileum in NO.27 patient with crohn disease	53	Zhi Pang, 242 Guangji Road, Suzhou, Jiangsu, China.	female	intestinal mucosa
27D			Homo sapiens	noninflamed mucosa of terminal ileum in NO.27 patient with crohn disease	53	Zhi Pang, 242 Guangji Road, Suzhou, Jiangsu, China.	female	intestinal mucosa
28B			Homo sapiens	inflamed mucosa of terminal ileum in NO.28 patient with crohn disease	50	Zhi Pang, 242 Guangji Road, Suzhou, Jiangsu, China.	male	intestinal mucosa
28D			Homo sapiens	noninflamed mucosa of terminal ileum in NO.28 patient with crohn disease	50	Zhi Pang, 242 Guangji Road, Suzhou, Jiangsu, China.	male	intestinal mucosa
30B			Homo sapiens	inflamed mucosa of terminal ileum in NO.30 patient with crohn disease	53	Zhi Pang, 242 Guangji Road, Suzhou, Jiangsu, China.	female	intestinal mucosa
30D			Homo sapiens	noninflamed mucosa of terminal ileum in NO.30 patient with crohn disease	53	Zhi Pang, 242 Guangji Road, Suzhou, Jiangsu, China.	female	intestinal mucosa
44B			Homo sapiens	inflamed mucosa of terminal ileum in NO.44 patient with crohn disease	53	Zhi Pang, 242 Guangji Road, Suzhou, Jiangsu, China.	female	intestinal mucosa
44D			Homo sapiens	noninflamed mucosa of terminal ileum in NO.44 patient with crohn disease	53	Zhi Pang, 242 Guangji Road, Suzhou, Jiangsu, China.	female	intestinal mucosa
