# Supplementary material for: Bacterial microbiome profiles of the inflamed terminal ileum mucosa in active Crohn’s disease patients
Source: PeerJ journal article supplement (doi:10.7717/peerj.19959), 2025-09-23
Supplement: STROBE.doc [file STROBE.doc]

STROBE Statement—Checklist of items that should be included in reports of ***case-control studies***

|  | Item No | Recommendation |
| --- | --- | --- |
| **Title and abstract** | 1 | (*a*) Indicate the study’s design with a commonly used term in the title or the abstract |
| (*b*) Provide in the abstract an informative and balanced summary of what was done and what was found  **Title, line 1-2.** A**bstract, line 27-44.** |
| Introduction | | |
| Background/rationale | 2 | Explain the scientific background and rationale for the investigation being reported  **Line 47-72** |
| Objectives | 3 | State specific objectives, including any prespecified hypotheses  **Line 73-79** |
| Methods | | |
| Study design | 4 | Present key elements of study design early in the paper  **Line 82-98** |
| Setting | 5 | Describe the setting, locations, and relevant dates, including periods of recruitment, exposure, follow-up, and data collection  **Line 82-98** |
| Participants | 6 | (*a*) Give the eligibility criteria, and the sources and methods of case ascertainment and control selection. Give the rationale for the choice of cases and controls  **Line 82-98** |
| (*b*)For matched studies, give matching criteria and the number of controls per case  **Not applicable** |
| Variables | 7 | Clearly define all outcomes, exposures, predictors, potential confounders, and effect modifiers. Give diagnostic criteria, if applicable  **Line 82-98** |
| Data sources/ measurement | 8* | For each variable of interest, give sources of data and details of methods of assessment (measurement). Describe comparability of assessment methods if there is more than one group  **Line 99-164** |
| Bias | 9 | Describe any efforts to address potential sources of bias  **Line 110-113,130-135** |
| Study size | 10 | Explain how the study size was arrived at  **Line 83** |
| Quantitative variables | 11 | Explain how quantitative variables were handled in the analyses. If applicable, describe which groupings were chosen and why  **Line 99-164** |
| Statistical methods | 12 | (*a*) Describe all statistical methods, including those used to control for confounding  **Line 109-164** |
| (*b*) Describe any methods used to examine subgroups and interactions  **Line 114-120, 143-148** |
| (*c*) Explain how missing data were addressed  **Line 110-120** |
| (*d*) If applicable, explain how matching of cases and controls was addressed  **Not applicable.** |
| (*e*) Describe any sensitivity analyses  **Line 82-90** |
| Results | | |
| Participants | 13* | (a) Report numbers of individuals at each stage of study—eg numbers potentially eligible, examined for eligibility, confirmed eligible, included in the study, completing follow-up, and analysed  **Not applicable. It is a self-controlled study with a single sampling.** |
| (b) Give reasons for non-participation at each stage  **Not applicable. It is a self-controlled study with a single sampling.** |
| (c) Consider use of a flow diagram  **Not applicable. It is a self-controlled study with a single sampling.** |
| Descriptive data | 14* | (a) Give characteristics of study participants (eg demographic, clinical, social) and information on exposures and potential confounders  **Table 1** |
| (b) Indicate number of participants with missing data for each variable of interest  **Not applicable** |
| Outcome data | 15* | Report numbers in each exposure category, or summary measures of exposure  **Line 284-285** |
| Main results | 16 | (*a*)Give unadjusted estimates and, if applicable, confounder-adjusted estimates and their precision (eg, 95% confidence interval). Make clear which confounders were adjusted for and why they were included  **Table 2** |
| (*b*) Report category boundaries when continuous variables were categorized  **Line 242-243, 260-261, 275-276** |
| (*c*) If relevant, consider translating estimates of relative risk into absolute risk for a meaningful time period  **Not applicable** |

| Other analyses | 17 | Report other analyses done—eg analyses of subgroups and interactions, and sensitivity analyses  **Line 262-276** |
| --- | --- | --- |
| Discussion | | |
| Key results | 18 | Summarise key results with reference to study objectives  **Line 284-305** |
| Limitations | 19 | Discuss limitations of the study, taking into account sources of potential bias or imprecision. Discuss both direction and magnitude of any potential bias  **Line 375-382** |
| Interpretation | 20 | Give a cautious overall interpretation of results considering objectives, limitations, multiplicity of analyses, results from similar studies, and other relevant evidence  **Line 306-372** |
| Generalisability | 21 | Discuss the generalisability (external validity) of the study results  **Line 375-382** |
| Other information | | |
| Funding | 22 | Give the source of funding and the role of the funders for the present study and, if applicable, for the original study on which the present article is based  **In the section “Funding statement” and “Declarations of Authorship”.** |

*Give information separately for cases and controls.

**Note:** An Explanation and Elaboration article discusses each checklist item and gives methodological background and published examples of transparent reporting. The STROBE checklist is best used in conjunction with this article (freely available on the Web sites of PLoS Medicine at http://www.plosmedicine.org/, Annals of Internal Medicine at http://www.annals.org/, and Epidemiology at http://www.epidem.com/). Information on the STROBE Initiative is available at http://www.strobe-statement.org.
